# Supplementary material
Source: ML conference proceedings conference paper supplement (https://openaccess.thecvf.com/content/cvpr_2016/html/Li_Iterative_Instance_Segmentation_2016_CVPR_paper.html)
Supplement: Supplementary file 1 [file Li_Iterative_Instance_Segmentation_2016_CVPR_supplemental.pdf]

# Iterative Instance Segmentation

## Supplementary Material

Ke Li  
UC Berkeley  
ke.li@eecs.berkeley.edu

Bharath Hariharan  
Facebook AI Research  
bharathh@fb.com

Jitendra Malik  
UC Berkeley  
malik@eecs.berkeley.edu

### 1. Per-Category Performance Comparison

We report the per-category performance of the proposed method compared to the state-of-the-art below.

| Method and Setting                               | aero        | bike        | bird        | boat        | bottle      | bus         | car         | cat         | chair       | cow         |                  |
|--------------------------------------------------|-------------|-------------|-------------|-------------|-------------|-------------|-------------|-------------|-------------|-------------|------------------|
| <i>Raw pixel-wise prediction:</i>                |             |             |             |             |             |             |             |             |             |             |                  |
| Hypercolumn [16]                                 | 74.8        | 57.4        | 61.6        | 38.3        | 32.3        | 79.1        | 57.9        | 82.3        | 20.8        | 55.2        |                  |
| Proposed Method                                  | <b>77.3</b> | <b>65.3</b> | <b>65.5</b> | <b>42.5</b> | <b>35.4</b> | <b>80.3</b> | <b>62.2</b> | <b>83.9</b> | <b>27.2</b> | <b>61.6</b> |                  |
| <i>With superpixel projection:</i>               |             |             |             |             |             |             |             |             |             |             |                  |
| Hypercolumn [16]                                 | <b>76.4</b> | 63.4        | 63.8        | <b>42.9</b> | 32.3        | 80.0        | 59.5        | <b>82.4</b> | 27.5        | 59.9        |                  |
| Proposed Method                                  | 76.3        | <b>64.9</b> | <b>65.1</b> | 42.6        | <b>35.1</b> | <b>80.6</b> | <b>61.2</b> | 80.9        | <b>28.3</b> | <b>61.7</b> |                  |
| <i>With superpixel projection and rescoring:</i> |             |             |             |             |             |             |             |             |             |             |                  |
| Hypercolumn [16]                                 | 78.2        | 67.0        | 68.2        | 46.9        | 42.0        | <b>82.9</b> | 66.7        | <b>85.0</b> | <b>31.2</b> | <b>66.7</b> |                  |
| Proposed Method                                  | <b>79.2</b> | <b>67.9</b> | <b>70.0</b> | <b>47.9</b> | <b>45.3</b> | 81.6        | <b>68.8</b> | 84.1        | 30.4        | 65.5        |                  |
| Method and Setting                               | table       | dog         | horse       | mbike       | person      | plant       | sheep       | sofa        | train       | tv          | mAP <sup>r</sup> |
| <i>Raw pixel-wise prediction:</i>                |             |             |             |             |             |             |             |             |             |             |                  |
| Hypercolumn [16]                                 | 27.5        | 80.0        | 65.3        | 69.6        | 52.4        | 27.5        | 58.1        | 44.7        | 77.5        | 59.9        | 56.1             |
| Proposed Method                                  | <b>32.4</b> | <b>82.3</b> | <b>70.9</b> | <b>71.4</b> | <b>63.1</b> | <b>31.3</b> | <b>63.6</b> | <b>44.9</b> | <b>78.3</b> | <b>62.4</b> | <b>60.1</b>      |
| <i>With superpixel projection:</i>               |             |             |             |             |             |             |             |             |             |             |                  |
| Hypercolumn [16]                                 | 30.1        | 81.0        | 69.3        | 70.6        | 60.8        | 27.3        | 60.7        | 45.6        | 77.3        | <b>61.8</b> | 58.6             |
| Proposed Method                                  | <b>33.6</b> | <b>82.2</b> | <b>71.2</b> | <b>71.9</b> | <b>63.7</b> | <b>31.1</b> | <b>65.1</b> | <b>49.6</b> | <b>78.9</b> | 61.5        | <b>60.3</b>      |
| <i>With superpixel projection and rescoring:</i> |             |             |             |             |             |             |             |             |             |             |                  |
| Hypercolumn [16]                                 | 30.1        | 82.0        | 73.1        | 73.3        | 64.6        | 37.3        | 68.9        | 41.4        | 75.3        | 67.9        | 62.4             |
| Proposed Method                                  | <b>31.8</b> | <b>83.6</b> | <b>75.5</b> | <b>74.5</b> | <b>66.6</b> | <b>37.7</b> | <b>70.6</b> | <b>44.7</b> | <b>77.7</b> | <b>68.7</b> | <b>63.6</b>      |

Table 1: Per-category AP<sup>r</sup> at 50% overlap achieved by the proposed method compared to the state-of-the-art on the PASCAL VOC 2012 validation set.

| Setting                                          | aero        | bike        | bird        | boat        | bottle      | bus         | car         | cat         | chair       | cow         |                  |
|--------------------------------------------------|-------------|-------------|-------------|-------------|-------------|-------------|-------------|-------------|-------------|-------------|------------------|
| <i>Raw pixel-wise prediction:</i>                |             |             |             |             |             |             |             |             |             |             |                  |
| Hypercolumn [16]                                 | 52.4        | 18.6        | 23.2        | 15.1        | 17.3        | 68.0        | 36.5        | 53.5        | 2.1         | 26.9        |                  |
| Proposed Method                                  | <b>61.8</b> | <b>31.5</b> | <b>42.0</b> | <b>22.0</b> | <b>22.7</b> | <b>72.4</b> | <b>44.8</b> | <b>65.4</b> | <b>7.2</b>  | <b>37.6</b> |                  |
| <i>With superpixel projection:</i>               |             |             |             |             |             |             |             |             |             |             |                  |
| Hypercolumn [16]                                 | 53.3        | 26.4        | 35.4        | <b>24.0</b> | 22.6        | 71.0        | 41.8        | 61.4        | 8.4         | 36.0        |                  |
| Proposed Method                                  | <b>57.4</b> | <b>33.2</b> | <b>42.9</b> | 23.1        | <b>23.4</b> | 71.0        | <b>44.9</b> | <b>64.4</b> | <b>10.8</b> | <b>40.6</b> |                  |
| <i>With superpixel projection and rescoring:</i> |             |             |             |             |             |             |             |             |             |             |                  |
| Hypercolumn [16]                                 | 55.6        | 28.7        | 41.2        | <b>26.8</b> | 25.5        | 73.5        | 45.2        | 64.7        | 10.6        | 42.3        |                  |
| Proposed Method                                  | <b>61.9</b> | <b>35.1</b> | <b>44.4</b> | 26.4        | <b>29.6</b> | <b>74.0</b> | <b>48.7</b> | <b>66.8</b> | <b>10.9</b> | <b>48.4</b> |                  |
| Setting                                          | table       | dog         | horse       | mbike       | person      | plant       | sheep       | sofa        | train       | tv          | mAP <sup>r</sup> |
| <i>Raw pixel-wise prediction:</i>                |             |             |             |             |             |             |             |             |             |             |                  |
| Hypercolumn [16]                                 | 8.1         | 47.4        | 20.7        | 35.4        | 15.6        | 7.2         | 28.4        | 14.9        | 53.2        | 44.3        | 29.4             |
| Proposed Method                                  | <b>10.4</b> | <b>60.4</b> | <b>39.6</b> | <b>41.9</b> | <b>32.5</b> | <b>12.0</b> | <b>40.9</b> | <b>19.9</b> | <b>58.8</b> | <b>50.8</b> | <b>38.7</b>      |
| <i>With superpixel projection:</i>               |             |             |             |             |             |             |             |             |             |             |                  |
| Hypercolumn [16]                                 | 10.9        | 58.1        | 32.8        | 41.2        | 27.6        | 10.2        | 37.6        | 25.6        | 56.4        | 48.3        | 36.4             |
| Proposed Method                                  | <b>14.3</b> | <b>62.7</b> | <b>42.1</b> | <b>44.1</b> | <b>36.2</b> | <b>11.6</b> | <b>44.4</b> | <b>27.6</b> | <b>60.1</b> | <b>49.7</b> | <b>40.2</b>      |
| <i>With superpixel projection and rescoring:</i> |             |             |             |             |             |             |             |             |             |             |                  |
| Hypercolumn [16]                                 | 12.3        | 60.8        | 41.7        | 42.1        | 27.3        | 15.5        | 45.2        | <b>23.9</b> | 56.6        | 47.8        | 39.4             |
| Proposed Method                                  | <b>13.6</b> | <b>64.0</b> | <b>53.0</b> | <b>46.8</b> | <b>33.0</b> | <b>19.0</b> | <b>51.0</b> | 23.7        | <b>62.2</b> | <b>53.9</b> | <b>43.3</b>      |

Table 2: Per-category AP<sup>r</sup> at 70% overlap achieved by the proposed method compared to the state-of-the-art on the PASCAL VOC 2012 validation set.

## 2. Additional Visualizations

The following are predictions of the proposed method and the vanilla hypercolumn net on additional images from various categories.

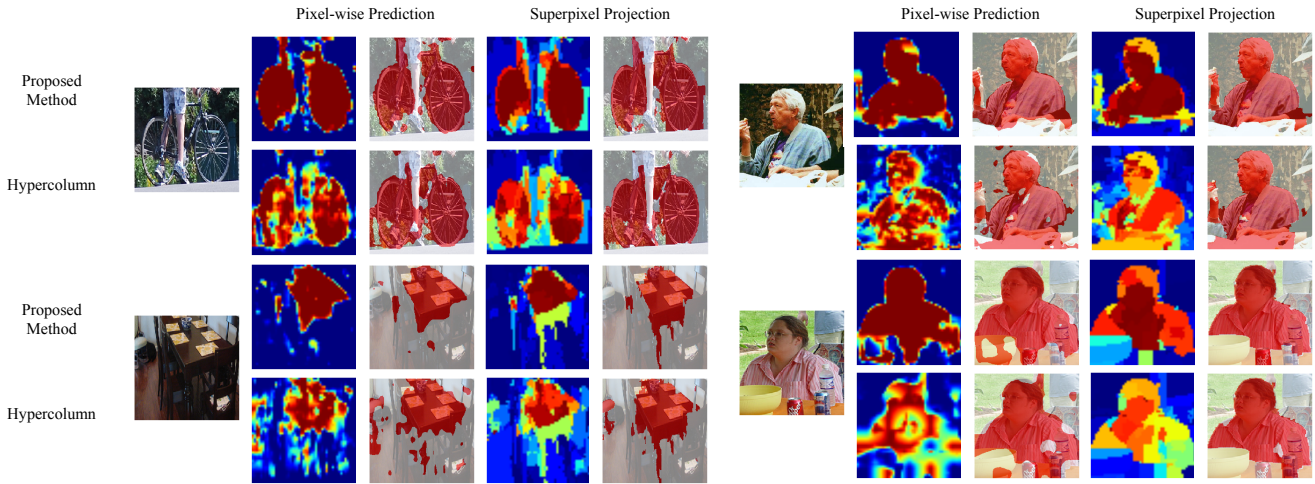

Figure 1: Comparison of heatmap and region predictions produced by the proposed method and the vanilla hypercolumn net on images from the PASCAL VOC 2012 validation set. Best viewed in colour.

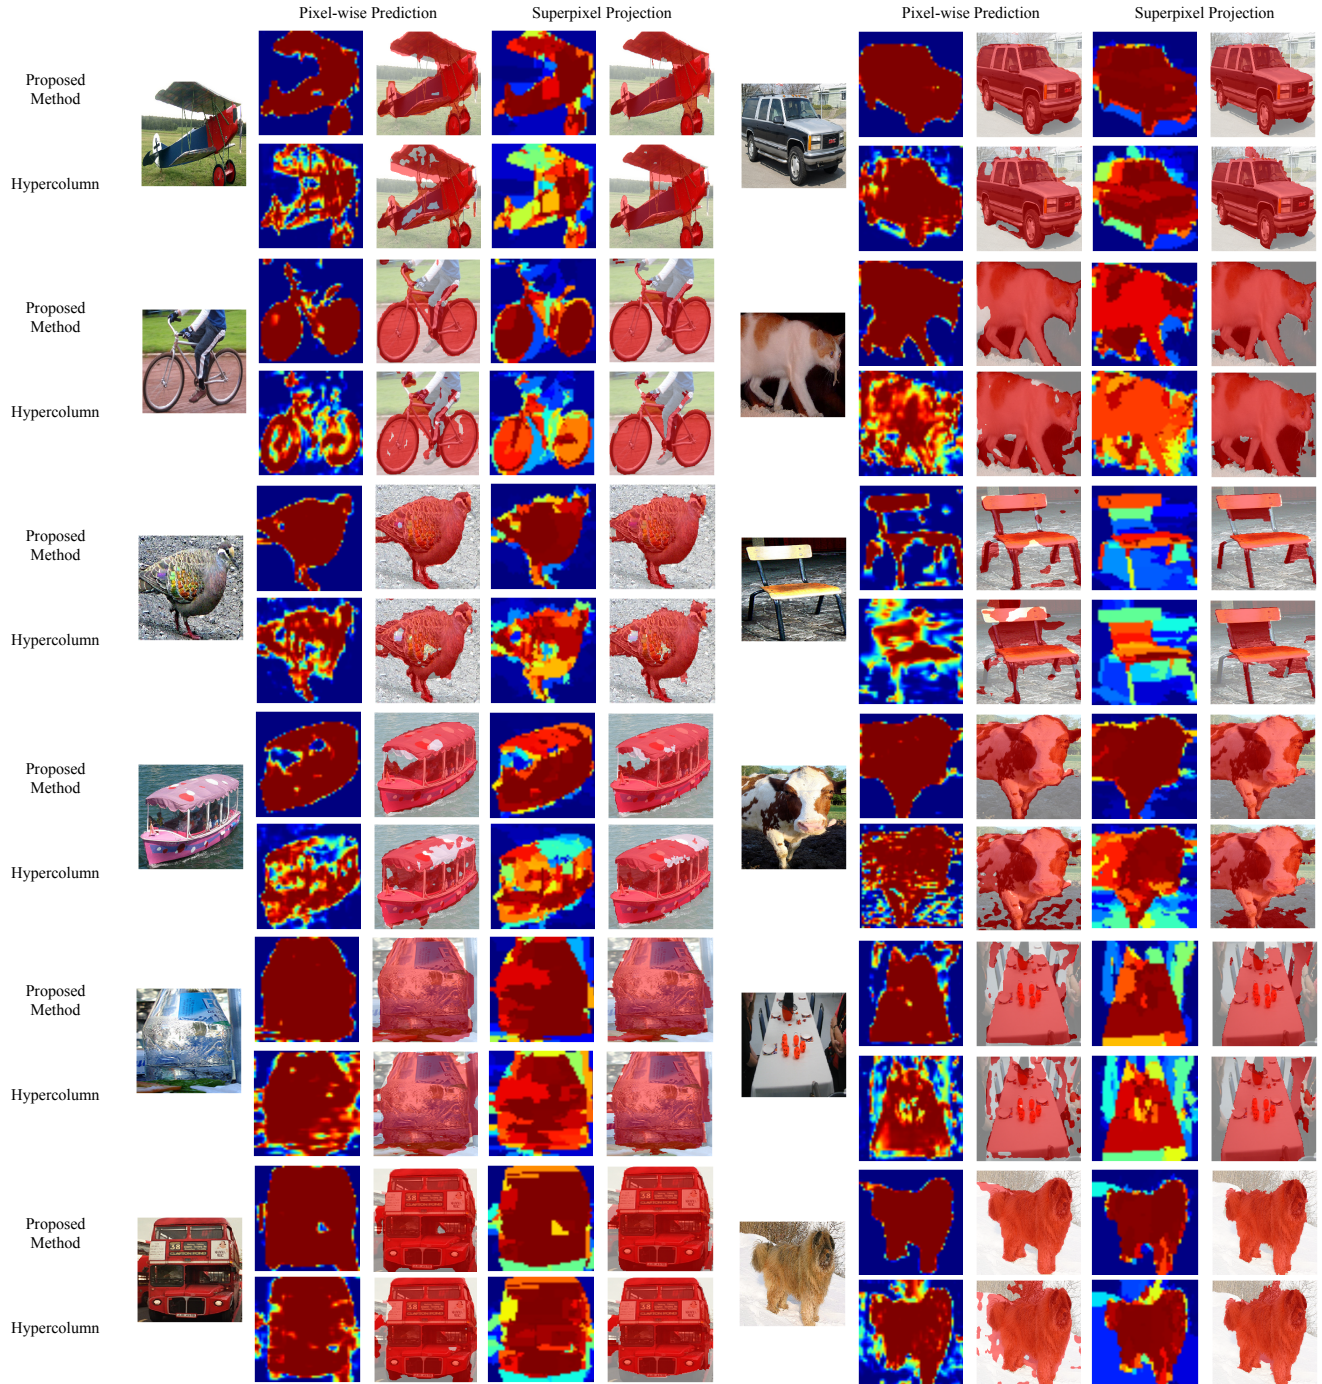

Figure 2: Comparison of heatmap and region predictions produced by the proposed method and the vanilla hypercolumn net on images from the PASCAL VOC 2012 validation set. Best viewed in colour.



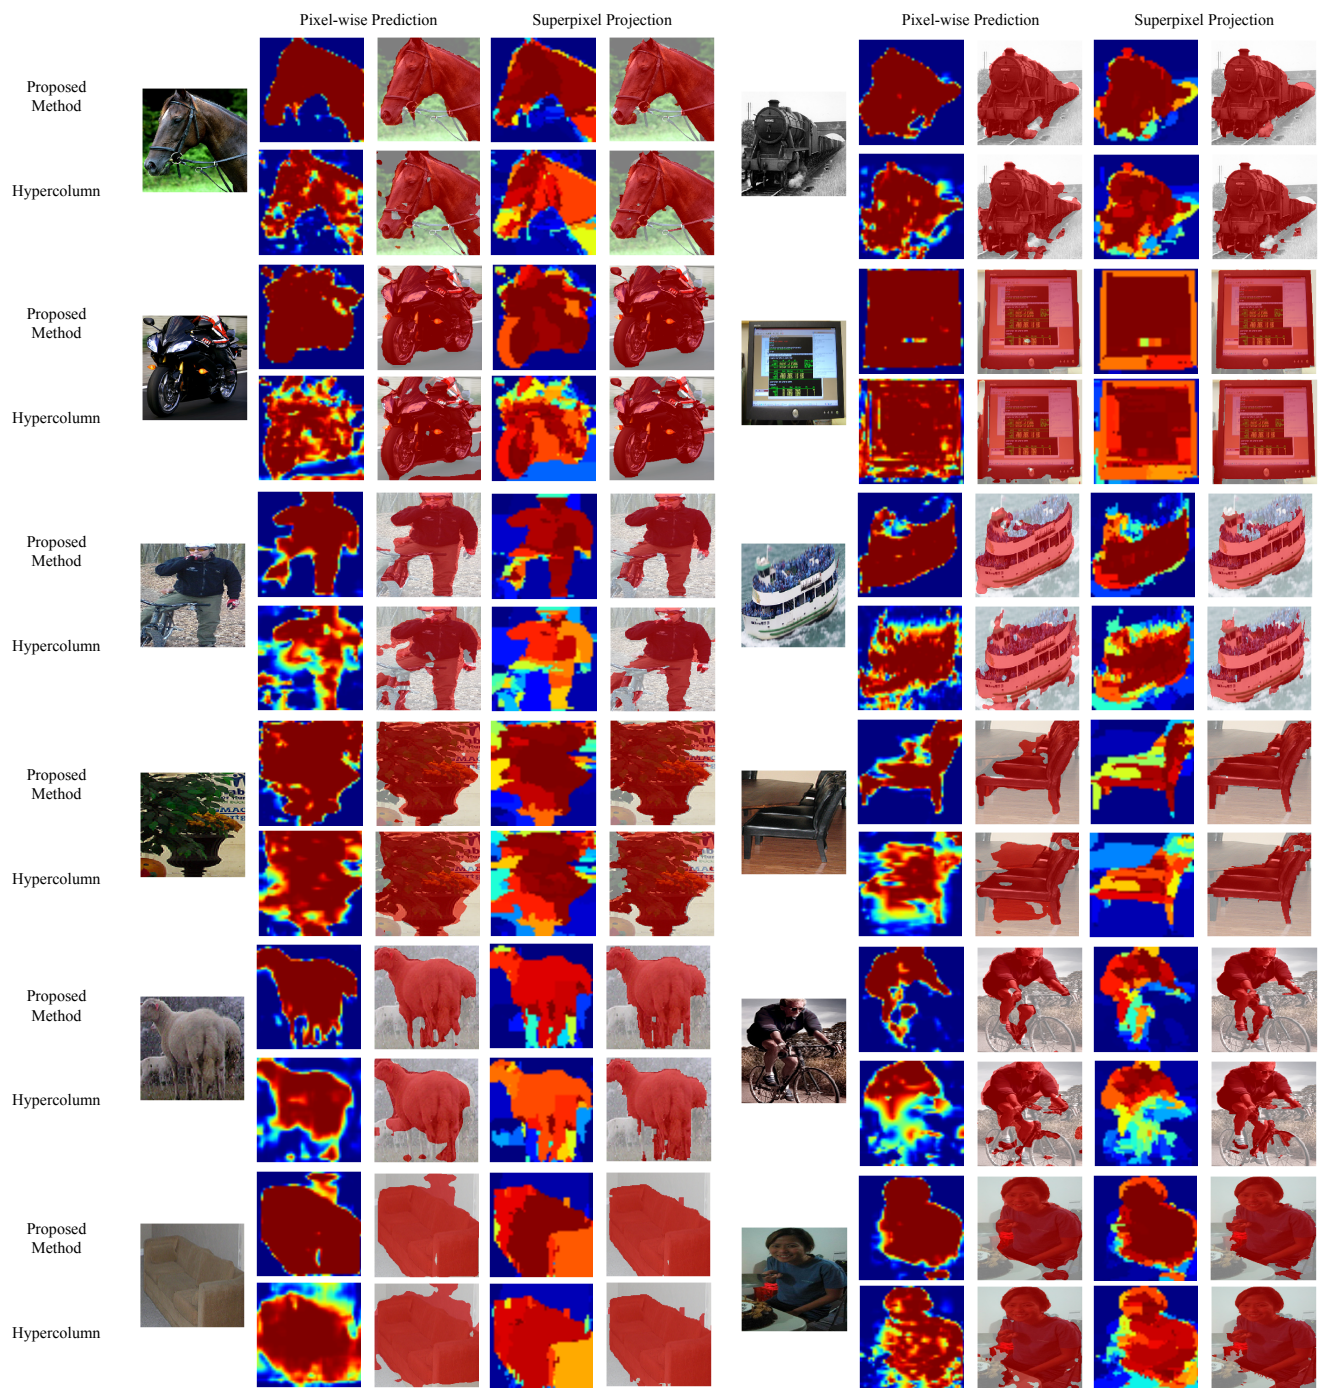

Figure 3: Comparison of heatmap and region predictions produced by the proposed method and the vanilla hypercolumn net on images from the PASCAL VOC 2012 validation set. Best viewed in colour.
